# Supplementary material
Source: bioRxiv or medRxiv preprint supplement (https://www.biorxiv.org/highwire/filestream/115948/field_highwire_adjunct_files/2/381434-3.pdf)

Slezak, Kandler et al.: Supplementary Figure 2

**a**

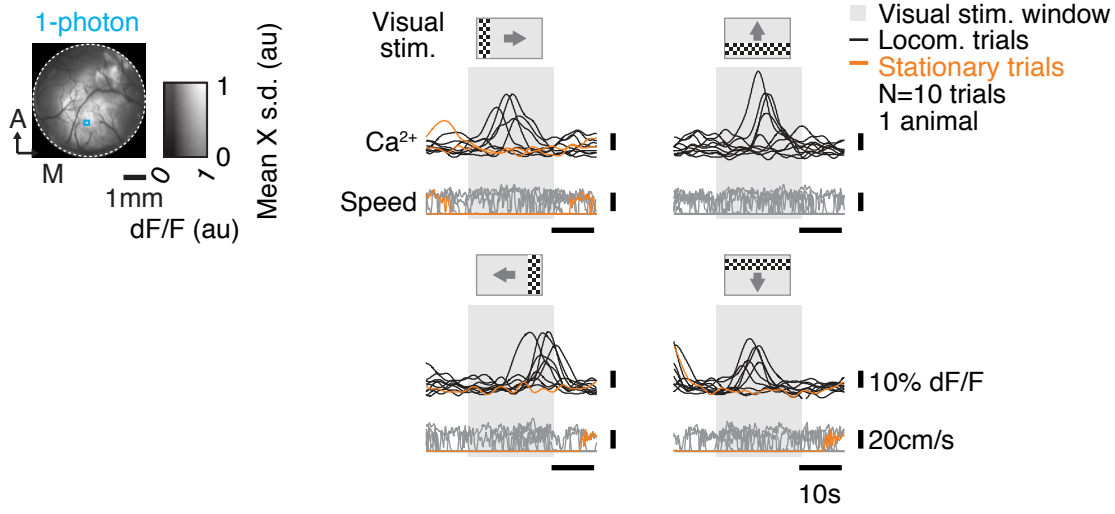

Supplement: Supplementary file [file 381434-3.pdf]
